# Supplementary material for: SP1-induced upregulation of lncRNA SPRY4-IT1 exerts oncogenic properties by scaffolding EZH2/LSD1/DNMT1 and sponging miR-101-3p in cholangiocarcinoma
Source: J Exp Clin Cancer Res. 2018 Apr 11;37:81. doi: 10.1186/s13046-018-0747-x (PMC5896100; doi:10.1186/s13046-018-0747-x)
Supplement: Supplementary file 1 — Table S1. Primer sequences and siRNAs/shRNA oligonucleotides information. (XLSX 12 kb) [file 13046_2018_747_MOESM1_ESM.xlsx]

## Sheet: Sheet1
Additional file 1: Table S1	sequence (5'-3')
Primer sequences
SPRY4-IT1 F	AGCCACATAAATTCAGCAGA
SPRY4-IT1 R	CGATGTAGTAGGATTCCTTTCA
SP1 F	GCACCTGCCCCTACTGTAAA
SP1 R	GTGCCTCTGTAGCTCATCCG
SPRY4 F	GAATTCCCTCCCCTTCTGCC
SPRY4 R	ACAGAGGCCAGGCAAGAAAA
KLF2 F	AGAGGGTCTCCCTCGATGAC
KLF2 R	TCTCACAAGGCATCACAAGC
P15 F	GGACTAGTGGAGAAGGTGCG
P15 R	GGGCGCTGCCCATCATCATG
P21 F	TGTCCGTCAGAACCCATGC
P21 R	AAAGTCGAAGTTCCATCGCTC
RND1 F	GATGTAAGCTCGTTCTGGTCG
RND1 R	AGCAATCCTTCGCTAACACTTG
LATS2 F	ACCCCAAAGTTCGGACCTTAT
LATS2 R	CATTTGCCGGTTCACTTCTGC
PTEN F	TGGATTCGACTTAGACTTGACCT
PTEN R	GGTGGGTTATGGTCTTCAAAAGG
NKD2 F	AGCGCAGATGACGGAGAGA
NKD2 R	CGAGACATCGCACTGGAGT
GAPDH F	GGGAGCCAAAAGGGTCAT
GAPDH R	GAGTCCTTCCACGATACCAA
U1 snRNA F	GGGAGATACCATGATCACGAAGGT
U1 snRNA R	CCACAAATTATGCAGTCGAGTTTCCC
SPRY4-IT1 P E1 region F	AGTCCTCTGCTTCCCTCAGC
SPRY4-IT1 P E1 region R	GAGAGCCTGCCCACCACTAT
SPRY4-IT1 P E2 region F	TGTGGGTGGGTGGGATTAGG
SPRY4-IT1 P E2 region R	GCCAGTCTGACACTCACTGC
SPRY4-IT1 P E3 region F	GTCTTGCTCTGTCACTCAGGCTAG
SPRY4-IT1 P E3 region R	CTGAGGCAGGAGAGTCACTTGAAC
KLF2 P107 F	GTAAAGGAACCCAGCCTGCC
KLF2 P107 R	CCCTCCTCCCCAACCTCAAT
KLF2 P616 F	GACTGGGCAACAGAGGGA
KLF2 P616 R	GAAGGAGGGAAGGATAGAGG
KLF2 P1026 F	ACGGGCTTATTGAGGTTGG
KLF2 P1026 R	GCCTGGGTGACAGAGGAGAC
LATS2 P366 F	GGCAGGAGGATGGCTTGA
LATS2 P366 R	GCCCTACTGGCATTACC
LATS2 P802 F	GACTGAAGGCTGGGTGAG
LATS2 P802 R	ATGGGAAACAGTAGTAAAGG
LATS2 P1060 F	CCCTGCTTCTGTCCCTGTA
LATS2 P1060 R	CCAGCAAGTGAGGTCGTG
LATS2 P1583 F	CCACTGTCCCAATAGCCG
LATS2 P1583 R	CCTGAAGGAGCCACCAAG

## Sheet: Sheet2
siRNAs/shRNA oligonucleotides
si-SP1-1	CAGCGUUUCUGCAGCUACCUUGACU
si-SP1-2	GACAGGUCAGUUGGCAGACUCUACA
si-SPRY4-IT1-1	GGTGGTTGAAAGGAATCCT
si-SPRY4-IT1-2	GCCTGTGAATGCCAACATC
si-SPRY4-IT1-3	GCTTTATCTGTAGGACATG
si-EZH2	AAGACTCTGAATGCAGTTGCT
si-LSD1	CAACCTCTCAGAAGATGAGTATTAT
si-DNMT1	CACAGCAAAGTGAAAGTCATCTACA
si-KLF2	CCAAGAGUUCGCAUCUGAATT
si-LATS2	CAGGTGGACTCACAATTCCAAATAT
sh-SPRY4-IT1	CACCGGTGGTTGAAAGGAATCCTCGAAAGGATTCCTTTCAACCACC
